# Modeling the USA Winter 2021 CoVID-19 Resurgence

Genghmun Eng

PhD Physics 1978, University of Illinois at Urbana-Champaign

January 6, 2022

## Abstract

The current USA 2021 CoVID-19 Winter Resurgence is modeled here with the same function used for analyzing prior USA CoVID-19 waves:

$$N(t) \approx \max\{N_o \exp\left(+\frac{t}{[t_R(1+\alpha_S t)]} \exp[-\delta_o t]\right)\}.$$

Here,  $N(t)$  gives the total number of CoVID-19 cases above the previous baseline, and  $t_R$  sets the initial  $t_{dbl} = t_R (\ln 2)$  pandemic  $t_{dbl}$  doubling time. Larger  $\alpha_S$  values indicate that uninfected people are improving their pandemic mitigation efforts, such as *Social Distancing* and *vaccinations*; while  $\delta_o > 0$  accelerates the post-peak  $\frac{d}{dt}N(t)$  *tail-off*, and is empirically associated with *mask-wearing*. The pandemic wave end is when  $N(t)$  no longer increases.

The USA Summer 2021 resurgence results from our prior *medrxiv.org* preprints\* were used as a baseline. By 11/15/2021, an additional  $N_o^{2021} \approx 107,000$  cases above baseline were found, signaling the USA Winter 2021 resurgence. This CoVID-19 wave is still in its *initial* stages. Presently, our analysis indicates that this CoVID-19 wave can infect virtually all susceptible persons; just like the *initial* stage of the USA Summer 2021 resurgence. Data up through 12/30/2021 gives these parameter values:

$$t_R \approx 8.05 \text{ days}; \alpha_S \approx 0.011 / \text{day}.$$

These values are identical to the prior 2020 USA Winter Resurgence results. Also, the  $N_o^{2021}(11/15/2021)$  and the  $N_o^{2020}(9/25/2020) = 89,900$  values are similar. However, while the Winter 2020 Resurgence showed a significant *mask-wearing* effect [ $\delta_o^{2020} = 1.748 \times 10^{-3} / \text{day}$ ], this *initial* USA Winter 2021 Resurgence shows practically no *mask-wearing* effects [ $\delta_o^{2021} \leq 0.001 \times 10^{-3} / \text{day}$ ]. If *mask-wearing* were to quickly rise to the Winter 2020 levels, it would give these projected totals:

$$N(t = [1/1/2022]) \approx 54,705,400 ;$$

$$N(t = [3/21/2022]) \approx 83,371,000 ;$$

$$N(t = [3/21/2024]) \approx 92,399,000 .$$

More robust *mask-wearing* and enhanced *Social Distancing* measures could further reduce these values (*with 3 Figures*).

\*(10.1101\_2021.08.16.21262150; 10.1101\_2021.10.15.21265078)

## 1 Introduction

Each new USA CoVID-19 wave usually starts with a sharp rise in the total number  $N(t)$  of new cases. The time evolution for each of these rise waves has been successfully modeled<sup>1-6</sup> using this basic function for  $N(t)$ :

$$N(t) \approx \max\{N_o \exp\left(+\frac{t}{t_R(1+\alpha_S t)}\right) \exp[-\delta_o t]\}. \quad [1.1]$$

Equation [1.1] represents the USA Winter 2021 CoVID-19 Resurgence cases above a baseline that is set by the USA Summer 2021 Resurgence from our prior *medrxiv.org* preprints<sup>5-6</sup>. The standard **SEIR** (Susceptible, Exposed, Infected, and Recovered or Removed) epidemiology models all start with an exponential growth ( $R_o > 1$ ) or decay ( $R_o < 1$ ):

$$\frac{d}{dt}N(t) = +K_R (R_o - 1) N(t) = [1/t_R] N(t), \quad [1.2a]$$

$$N(t) = N_o \exp[+t/t_R], \quad [1.2b]$$

$$t_{dbl} = t_R (\ln 2), \quad [1.2c]$$

where  $t_R > 0$  sets the initial growth rate, and  $t_{dbl}$  sets the initial  $N(t)$  doubling-time. Virtually all **SEIR** models are *local* models, with  $R_o$  representing the average number of people who will become infected by an ailing person during the course of their illness.

Given a total population of  $N_{ALL}$ , the *uninfected population*  $U(t)$  is:

$$U(t) = [N_{ALL} - N(t)]. \quad [1.3]$$

Using Eq. [1.1] implicitly assumes that  $N(t) \ll N_{ALL}$  for all times of interest, so that pandemic saturation effects can be ignored. In general, **SEIR** models do not explicitly consider what the  $U(t)$  *uninfected population* may be doing in response to the pandemic, prior to becoming infected. In contrast, Eq. [1.1] was developed as a *non-local* extension of **SEIR** models, to explicitly take into account what the *uninfected population*, as a whole, is doing to mitigate pandemic spread.

Since Eq. [1.1] is empirically based, it does not predict when each new CoVID-19 wave will start, or what biological and social circumstances are causing the new wave. As a result, the  $t = 0$  point for each wave is usually set by when the resurgence is first easily identified, with  $N(t = 0) = N_o$  being the number of cases above baseline at that time. But once the CoVID-19 wave becomes established, Eq. [1.1] appears to successfully predict its time evolution.

As given in our prior preprints<sup>1-6</sup>, the parameter  $\alpha_S$  measures the combined effect of virtually all large-scale pandemic mitigation efforts. These include *Social Distancing* requirements, such as minimum separation distances and decreased allowable occupancy; along with lockdowns, "stay at home" orders, school closures, and restrictions on business operations; as well as the impact of large-scale vaccination efforts. The  $\delta_o > 0$  parameter accelerates the post-peak  $\frac{d}{dt}N(t)$  *tail-off*, and our prior work<sup>3-6</sup> shows that it is empirically associated with *mask-wearing*.

The calculated end for each pandemic wave occurs when  $N(t)$  in Eq. [1.1] for the total number of cases first stops increasing, which makes the final stages of calculated post-peak  $\frac{d}{dt}N(t)$  *tail-off* inaccurate. However, the pandemic wave is substantially over by then, assuming that no follow-on resurgence occurs.

## 2 The USA Winter 2021 Resurgence

Our CoVID-19 modeling using the same few parameters has been successful at predicting the time evolution of each prior USA CoVID-19 wave<sup>1-6</sup>. This result shows that the **response** of the  $U(t)$  *uninfected population* was similar for each wave, even if different dominating factors drove each new resurgence.

Deviations of  $\sim 107,000$  extra cases above the USA Summer 2021 baseline were observed by 11/15/2021. Thus, the USA is now in the *initial* stages of a Winter 2021 resurgence, as shown in *Figure 1*. Our calculations indicate that this CoVID-19 wave presently can infect virtually all susceptible people; a result that is similar to the *initial* stage of the USA Summer 2021 wave<sup>5</sup>.

In addition, two of the three Eq. [1.1] parameter values, as determined using the data up through 12/30/2021, were found to be identical to the 2020 USA Winter Resurgence values as follows:

$$t_R \approx 8.05 \text{ days}; \quad [2.1a]$$

$$\alpha_S \approx 0.011 / \text{days}. \quad [2.1b]$$

Both CoVID-19 Winter Resurgences also have similar  $N_o$  values:

$$N_o(\text{Winter 2020, 9/25/2020}) = 89,900; \quad [2.2a]$$

$$N_o(\text{Winter 2021, 11/15/2021}) = 107,000; \quad [2.2b]$$

indicating that both waves started similarly. However, the Winter 2020 Resurgence was associated with a non-negligible amount of *mask-wearing*, as measured by  $\delta_o$  in Eq. [1.1]. In contrast, this *initial* stage of the USA Winter 2021 wave is associated with having virtually no *mask-wearing* effects:

$$\delta_o(\text{Winter 2020}) = 1.748 \times 10^{-3} / \text{day}; \quad [2.3a]$$

$$\delta_o(\text{Winter 2021}) \leq 0.001 \times 10^{-3} / \text{day}. \quad [2.3b]$$

In *Figure 2*, the  $\{N_o; t_R; \alpha_S; \delta_o\}$  parameter values for this Winter 2021 Resurgence are compared to each of the prior USA CoVID-19 waves. If *mask-wearing* were now to quickly rise to the Winter 2020 levels, without changing the other Winter 2021 Resurgence parameters, the total number of projected USA CoVID-19 cases would be:

$$N(t = [1/1/2022]) \approx 54,705,400; \quad [2.4a]$$

$$N(t = [3/21/2022]) \approx 83,371,000; \quad [2.4b]$$

$$N(t = [3/21/2024]) \approx 92,399,000. \quad [2.4c]$$

Without *mask-wearing* [ $\delta_o \approx 0$ ], the 3/21/2022 projection would change to:

$$N(t = [1/1/2022]) \approx 54,705,400; \quad [2.5a]$$

$$N(t = [3/21/2022]) \approx 126,463,000; \quad [2.5b]$$

with the calculated  $N(t)$  for [3/21/2024] substantially exceeding the  $N_{ALL}$  total US population. At that point the Eq. [1.1] assumption that  $N_{ALL}$  is large enough so that  $N(t) \ll N_{ALL}$  for all times of interest, would no longer be valid. The USA would be in a pandemic saturation stage, where practically everybody is or was infected.

*Figure 3* shows our model predictions vs CoVID-19 data for the entire pandemic, from March 2020 through January 2022. Whenever the pandemic appeared to be beaten down, restrictions were relaxed, CoVID-19 cases increased, new CoVID-19 variants appeared, and the pandemic rose up again, almost with every season.

The daily number of new cases  $dN(t)/dt$  in *Figure 3* has peaks for the initial Spring 2020 pandemic; a Summer 2020 resurgence; the long Winter 2020 Resurgence; a small uptick in Spring 2021; the USA Summer 2021 Resurgence; and now the USA Winter 2021 Resurgence.

In addition, *Figure 3* shows Winter 2021 Resurgence projections for two different  $\delta_o$ -values. One projection is the best datafit to date (12/30/2021), and uses  $\delta_o \leq 0.001 \times 10^{-3} / \text{day}$ . The other projection is how the Winter 2021 Resurgence would progress, if  $\delta_o$  were to suddenly increase to the prior Winter 2020 Resurgence value of  $\delta_o = 1.748 \times 10^{-3} / \text{day}$ .

### 3 Summary

It is January 2022, and the USA is in the midst of the *initial stages* of a CoVID-19 Winter 2021 Resurgence. Using the USA CoVID-19 Summer 2021 Resurgence as a baseline<sup>5-6</sup>, the latest CoVID-19 wave was modeled using:

$$N(t) \approx \max\{N_o \exp(+ \frac{t}{[t_R(1+\alpha_S t)]}) \exp[-\delta_o t]\}, \quad [3.1]$$

with those results shown in *Figure 1*. This function was used to analyze each previous USA CoVID-19 wave<sup>1-6</sup>. Since the same few parameters successfully apply to all these USA CoVID-19 waves, with only different  $t = 0$  starting points and  $\{N_o; t_R; \alpha_S; \delta_o\}$  parameter values allowed, it shows that the **response** of the  $U(t)$  *uninfected population* has been similar for each CoVID-19 wave, even if different factors were driving each new resurgence.

This effect is best seen by comparing the parameters derived for this *initial stage* of the USA CoVID-19 Winter 2021 Resurgence to the prior USA CoVID-19 Winter 2020 Resurgence, as shown in *Figure 2*. Both have similar  $\{N_o; t_R; \alpha_S\}$  parameter values, indicating the USA population is in a similar position with respect to CoVID-19 in both cases. No doubt, the large number of Winter 2021 CoVID-19 Resurgence cases is being driven by infections from the most recent *Omicron* CoVID-19 variant.

However, back on Jan. 7, 2021, during the Winter 2020 Resurgence, only about  $\sim 3\%$  of the USA population had received any vaccinations, with only  $\sim 0.3\%$  being fully vaccinated. At that time, the  $U(t)$  *uninfected population* was substantially unvaccinated. In contrast, by Jan. 2022, a substantial fraction of the  $U(t)$  *uninfected population* was considered fully vaccinated.

Given the known capacity for the *Omicron* CoVID-19 variant to infect *fully vaccinated* persons, the similarity in the  $\{N_o; t_R; \alpha_S\}$  parameters between these two USA Winter Resurgences, shows that the USA *vaccinated population* is in a similar position to the USA *unvaccinated population* a year ago. Such a result brings CoVID-19 infection closer to becoming *endemic*. The 'silver lining' to this dour cloud is that those who are vaccinated appear to have much less severe CoVID-19 infection impacts.

One significant difference between this *initial stage* of the USA CoVID-19 Winter 2021 Resurgence and the prior USA CoVID-19 Winter 2020 Resurgence is that the  $\delta_o$ -parameter associated with *mask-wearing* was significantly higher

in 2020, compared to this *initial stage* of the USA CoVID-19 Winter 2021 Resurgence, which showed a  $\delta_o \approx 0$  result.

If  $\delta_o \approx 0$  persists, along with the present  $\{N_o; t_R; \alpha_S\}$  values, this CoVID-19 Winter 2021 Resurgence will have the capacity to infect nearly everyone who is not practicing the strictest CoVID-19 prevention protocols, with the resulting  $N(t)$  projections for  $\delta_o \approx 0$  given in the prior section. Significantly increased *mask-wearing* and enhanced *Social Distancing* measures are needed to prevent these high levels of USA CoVID-19 projected cases from actually occurring.

## 4 List of Figures

*Figure 1: The USA CoVID-19 Winter 2021 Resurgence, By Itself.*

*Figure 2: Summary of CoVID-19 Model and Parameter Values.*

*Figure 3: USA CoVID-19 Totals: 3/21/2020 through 12/30/2021.*

## 5 References

1. <https://medrxiv.org/cgi/content/short/2020.05.04.20091207v1>  
“Initial Model for the Impact of Social Distancing on CoVID-19 Spread”
2. <https://medrxiv.org/cgi/content/short/2020.06.30.20143149v1>  
“Orthogonal Functions for Evaluating  
Social Distancing Impact on CoVID-19 Spread”
3. <https://medrxiv.org/cgi/content/short/2020.08.07.20169904>  
“Model to Describe Fast Shutoff of CoVID-19 Pandemic Spread”
4. <https://medrxiv.org/cgi/content/short/2020.09.16.20196063>  
“Initial Model for USA CoVID-19 Resurgence”
5. <https://medrxiv.org/cgi/content/short/2021.08.16.21262150>  
“The *IHME* vs Me: Modeling USA CoVID-19 Spread,  
Early Data to the *Fifth Wave*”
6. <https://medrxiv.org/cgi/content/short/2021.10.15.21265078>  
“Updated Model for the USA Summer 2021 CoVID-19 Resurgence”

**Fig. 1: The USA CoVID-19 Winter 2021 Resurgence, By Itself**

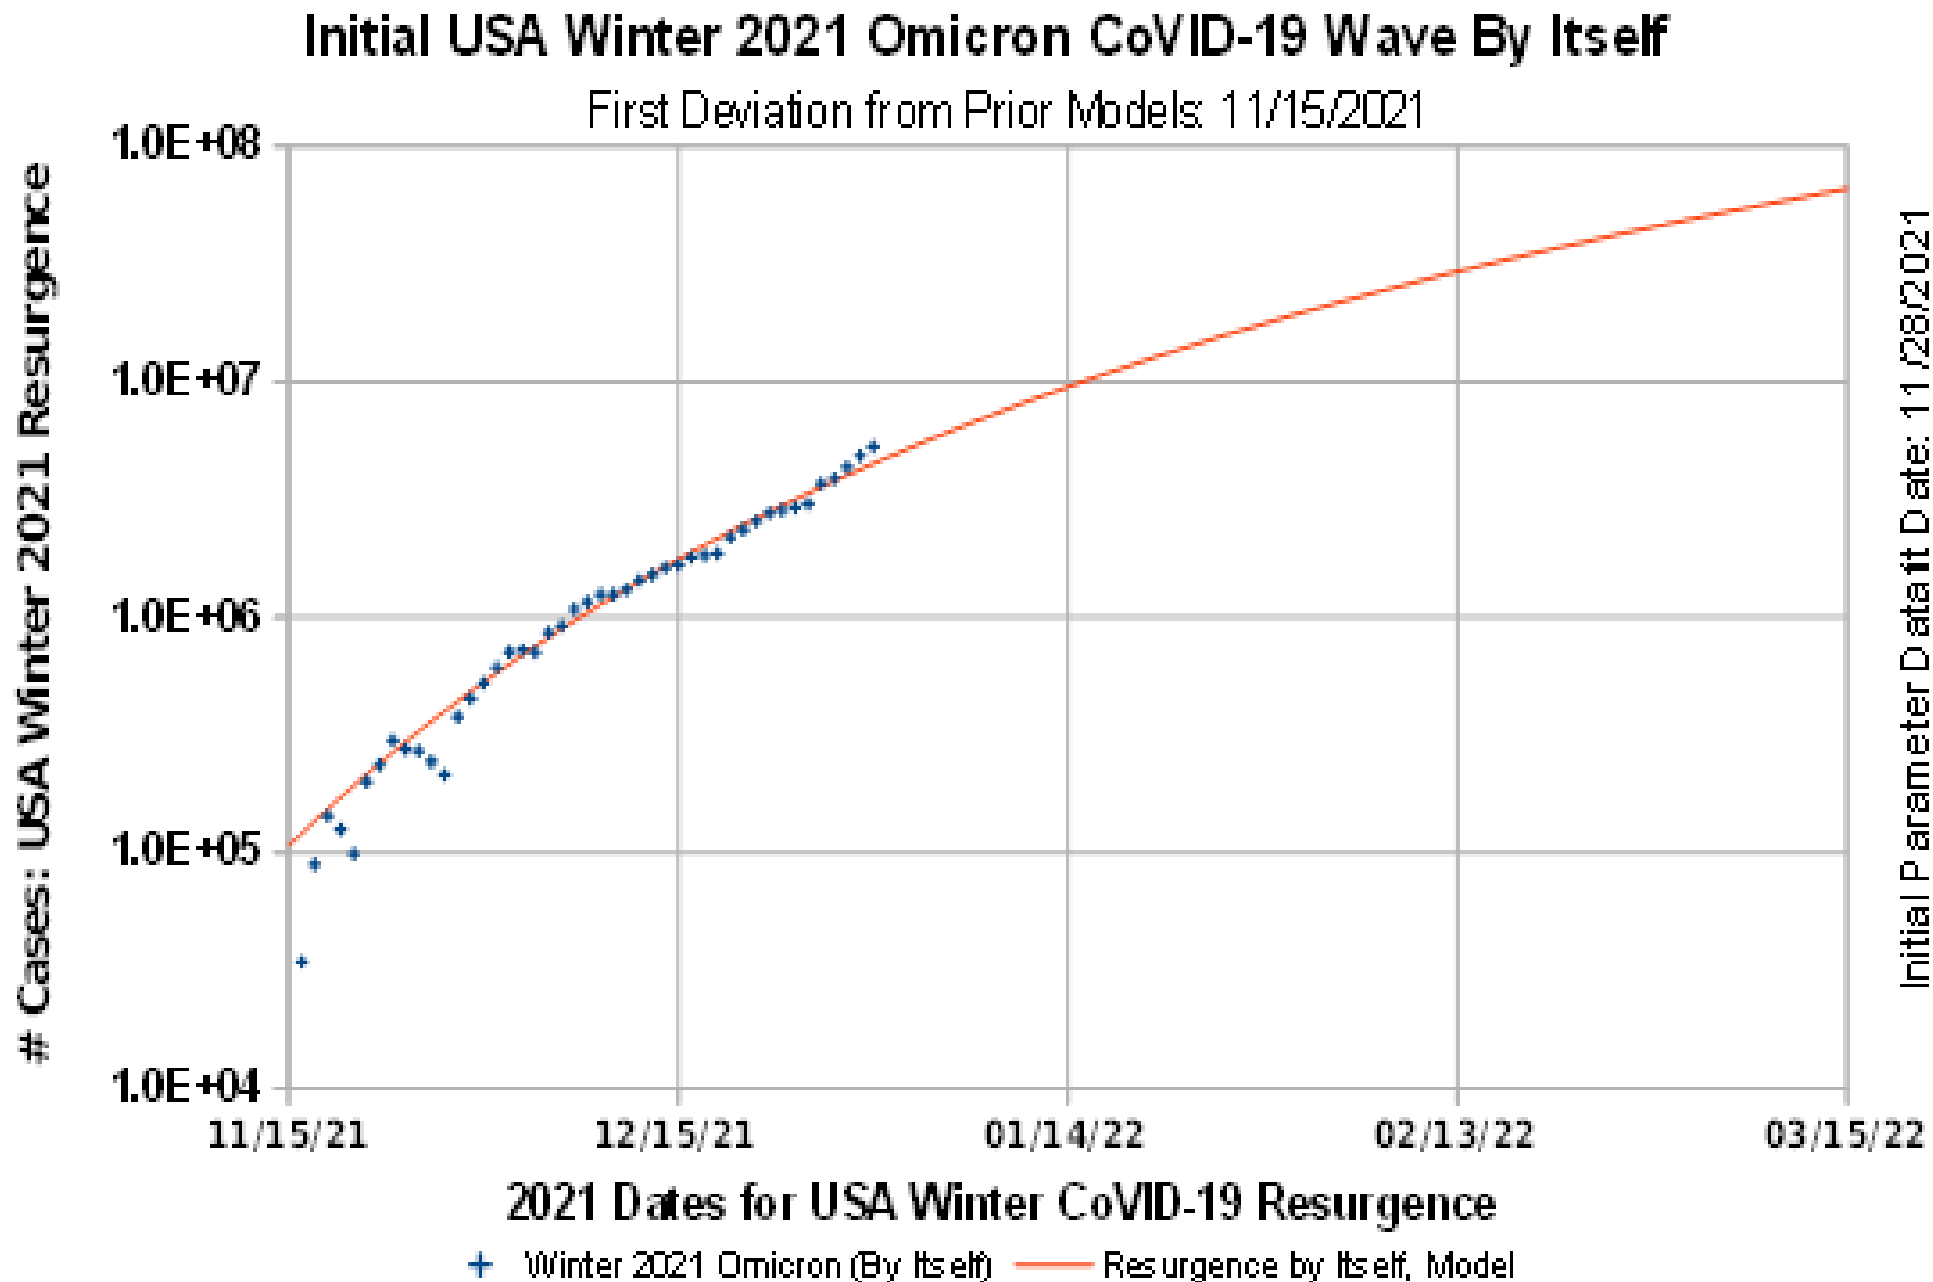

**Fig. 2: Summary of CoVID-19 Model and Parameter Values**

| Index | U.S.A. CoVID-19 Stage                                           | $N_0$ , (Initial $t=0$ Value) | $t=0$ Date | $t/dbl$ days, at $t=0$ | $t_R$ value | $\alpha_S$ value | $\delta_0$ value |
|-------|-----------------------------------------------------------------|-------------------------------|------------|------------------------|-------------|------------------|------------------|
| 1     | Ini. Model 6/7/20 Update                                        | 23,710                        | 03/21/2020 | 1.99657                | 2.88044     | 0.06618          | 0.00000          |
| 2     | 1 <sup>st</sup> Resurgence Summer 2020 =>                       | 15,650                        | 06/07/2020 | 2.88000                | 4.15496     | 0.058__          | 0.0108_          |
| 3     | Winter 2020 Resurgence =>                                       | 88,900                        | 09/25/2020 | 5.57983                | 8.05__      | 0.011__          | 0.001748         |
| 4     | Small Spring 2021 Resurgence =>                                 | 146,000                       | 03/19/2021 | 5.57983                | 8.05__      | 0.00128          | 0.01365          |
| 5     | Initial Portion, Summer 2021 Resurgence =>                      | 41,000                        | 06/07/2021 | 9.08924                | 13.113_     | 0.0030_          | 0.00000          |
| 6     | Latter Portion, Summer 2021 Resurgence =>                       | 3,200,000                     | 08/13/2021 | 14.44339               | 20.83740    | 0.019999         | 0.000489         |
| 7     | Initial Portion, Winter 2021 Resurgence =>                      | 107,000                       | 11/15/2021 | 5.57983                | 8.05__      | 0.011__          | 0.000001         |
| 8     | Winter 2021 Extrapolation using Winter 2020 $\delta_0$ value => | 107,000                       | 11/15/2021 | 5.57983                | 8.05__      | 0.011__          | 0.001748         |

**Fig. 3: USA CoVID-19 Totals: Data 3/21/2020 through 12/30/2021**

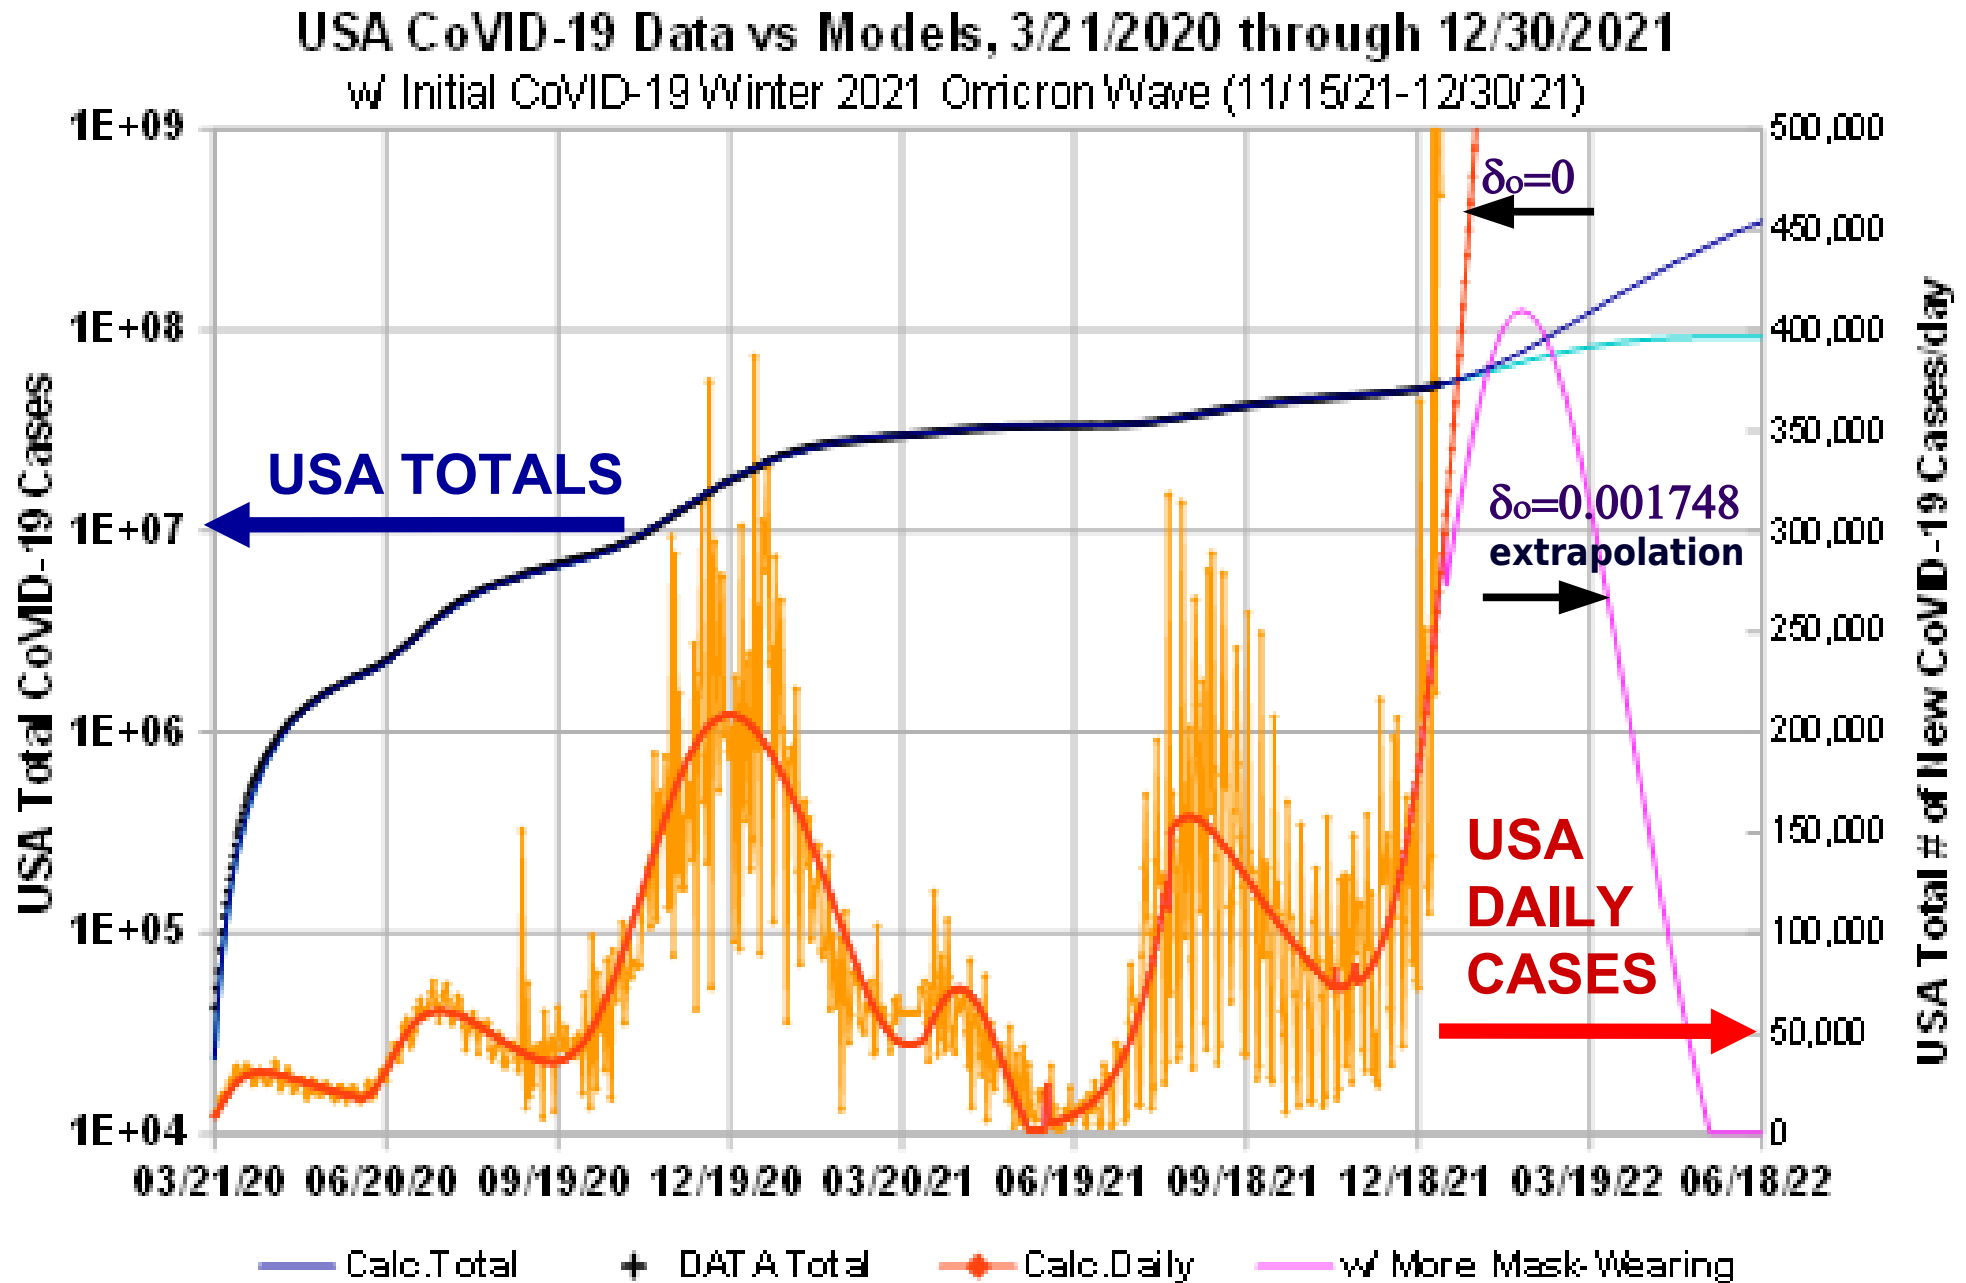

Source: https://www.medrxiv.org/content/10.1101/2022.01.06.22268868.full.pdf
